# Supplementary material for: Prolonged transition time between colostrum and mature milk in a bear, the giant panda, Ailuropoda melanoleuca
Source: PubMed Central journal article supplement (PMC4632522; doi:10.1098/rsos.150395), 2015-10-21
Supplement: rsos150395supp1.pdf [file rsos150395supp1.pdf]

# **Prolonged transition time between colostrum and mature milk in a bear, the giant panda, *Ailuropoda melanoleuca***

Kate Griffiths<sup>1</sup>, Rong Hou<sup>2</sup>, Hairui Wang<sup>2</sup>, Zhihe Zhang<sup>2</sup>, Liang Zhang<sup>2</sup>, Tong Zhang<sup>3</sup>, David G. Watson<sup>3</sup>, Richard J.S. Burchmore<sup>4</sup>, I. Kati Loeffler<sup>2\*</sup> and Malcolm W. Kennedy<sup>1</sup>.

<sup>1</sup> Institute of Biodiversity, Animal Health and Comparative Medicine, Graham Kerr Building, College of Medical, Veterinary and Life Sciences, University of Glasgow, Glasgow G12 8QQ, Scotland, UK.

<sup>2</sup> The Sichuan Key Laboratory for Conservation Biology on Endangered Wildlife; Chengdu Research Base of Giant Panda Breeding, 1375 Panda Road, Northern Suburb, Chengdu, Sichuan Province, P.R. China, 610081.

<sup>3</sup> Strathclyde Institute of Pharmacy and Biomedical Sciences, University of Strathclyde, 161 Cathedral Street, Glasgow G4 0RE, Scotland, UK.

<sup>4</sup> Institute of Infection, Immunity and Inflammation and Glasgow Polyomics, University of Glasgow, Garscube Campus, Glasgow G12 1QH, Scotland, UK.

\* Present address: International Fund for Animal Welfare, 290 Summer Street, Yarmouth Port, MA 02675, USA.

## **Electronic supplementary material**

**Figure S1.** Altriciality of the neonates of giant pandas.

**Table S1.** Reproductive history and milk sampling times of giant pandas from whom samples were collected.

**Figure S2.** Changes in protein profiles of giant panda milk with time after parturition – preparative two-dimensional gels.

**Table S2.** Identification of the proteins isolated from bands excised from the two-dimensional gels shown in Figure S2.

**Table S3.** Proteins in giant panda milk. Identification of the proteins isolated from bands excised from the one-dimensional gels shown in Figure 3 in the main paper.

**Table S4.** Relative abundance of the 10 most common small molecules in giant panda milks in colostrum and mature milk, compared with mature phase human and cow milks.

**Table S5.** Milk oligosaccharides reported in this and previous studies on giant pandas and other species of bear, and their post-partum trends in giant panda milk.

**Figure S3.** Diversity in the concentration time courses of selected giant panda milk oligosaccharides with time after birth.

## **References for electronic supplementary material**

**Figure S1. Altriciality of the neonates of giant pandas.** Photographs of newly born giant panda cubs with their mothers illustrating both their highly altricial stage of development, the relative size of mothers and cubs, and thus the considerable degree of maternal care required. Images courtesy of Chengdu Research Centre for Giant Panda Breeding.

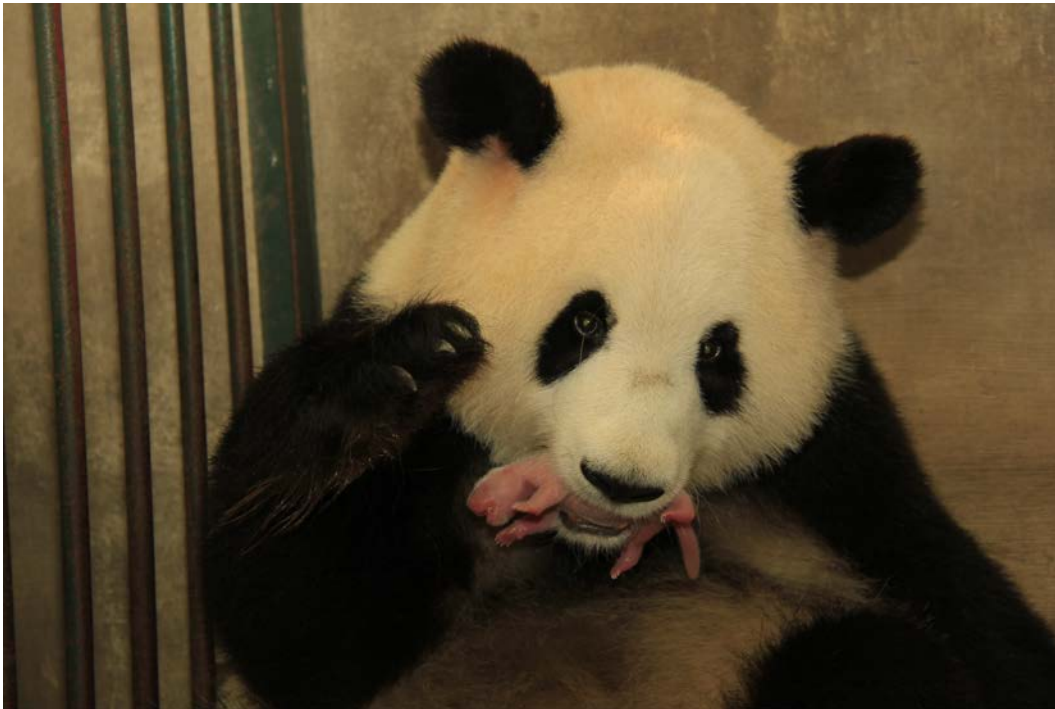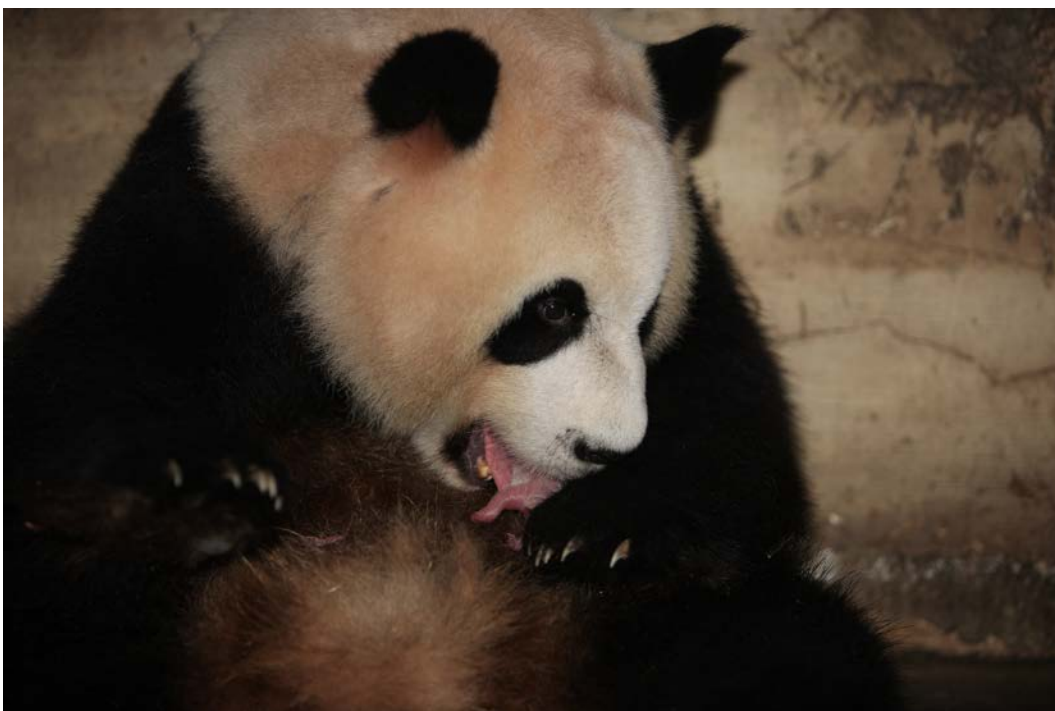

**Table S1. Reproductive history and milk sampling times of giant pandas from whom samples were collected.** All mothers and cubs were born in captivity. ISN, International Studbook Number. Parturition dates in bold indicate the beginning of the lactation period from which samples were collected.

| Name, ISN & date of birth    | Parturition history                              | Milk sample collection dates | Days post-partum |
|------------------------------|--------------------------------------------------|------------------------------|------------------|
| Ya Ya<br>362<br>24 Aug 1990  | 9 Sept 1997, twins; 1 died same day              | 13 Jan 2007                  | 147              |
|                              |                                                  | 18 Jan 2007                  | 152              |
|                              | 9 Sept 1999, twins                               | 23 Jan 2007                  | 157              |
|                              | 20 Aug 2001, twins                               | 29 Jan 2007                  | 163              |
|                              | 28 Aug 2002, twins                               | 31 Jan 2007                  | 165              |
|                              | 6 Sept 2003, single                              | 07 Feb 2007                  | 172              |
|                              | 30 Aug 2005, single                              |                              |                  |
|                              | <b>19 Aug 2006, single</b>                       |                              |                  |
| 24 Aug 2008, single          |                                                  |                              |                  |
| 10 Sept 2010, single         |                                                  |                              |                  |
| <hr/>                        |                                                  |                              |                  |
| Li Li<br>387<br>03 Sept 1992 | 12 July 2001, twins, died 19 Sept & 17 Oct, 2001 | 07 Aug 2007                  | 4                |
|                              | 08 July 2002, single, died 08 July 2002          | 25 July 2011                 | 1                |
|                              | <b>03 Aug 2007, single, died same day</b>        | 26 July 2011                 | 2                |
|                              | 19 July 2009, twins                              | 28 July 2011                 | 4                |
|                              | <b>24 July 2011, single</b>                      | 29 July 2011                 | 5                |
|                              | <b>28 July 2012, twins, 1 died same day</b>      | 30 July 2011                 | 6                |
|                              |                                                  | 31 July 2011                 | 7                |
|                              |                                                  | 01 Aug 2011                  | 8                |
|                              |                                                  | 02 Aug 2011                  | 9                |
|                              |                                                  | 03 Aug 2011                  | 10               |
|                              |                                                  | 05 Aug 2011                  | 12               |
|                              |                                                  | 06 Aug 2011                  | 13               |
|                              |                                                  | 07 Aug 2011                  | 14               |
|                              |                                                  | 08 Aug 2011                  | 15               |
|                              |                                                  | 09 Aug 2011                  | 16               |
|                              |                                                  | 10 Aug 2011                  | 17               |
|                              |                                                  | 11 Aug 2011                  | 18               |
|                              |                                                  | 12 Aug 2011                  | 19               |
|                              |                                                  | 14 Aug 2011                  | 21               |
|                              |                                                  | 15 Aug 2011                  | 22               |
|                              |                                                  | 29 July 2012                 | 1                |
|                              |                                                  | 30 July 2012                 | 2                |
|                              | 31 July 2012                                     | 3                            |                  |
|                              | 1 Aug 2012                                       | 4                            |                  |
|                              | 2 Aug 2012                                       | 5                            |                  |
|                              | 3 Aug 2012                                       | 6                            |                  |
|                              | 4 Aug 2012                                       | 7                            |                  |
|                              | 5 Aug 2012                                       | 8                            |                  |
|                              | 6 Aug 2012                                       | 9                            |                  |
|                              | 8 Aug 2012                                       | 11                           |                  |
|                              | 9 Aug 2012                                       | 12                           |                  |

| Name, ISN & date of birth        | Parturition history                                                                          | Milk sample collection dates                                                                                                                                                                                                                                                                                                           | Days post-partum                                                                                                      |
|----------------------------------|----------------------------------------------------------------------------------------------|----------------------------------------------------------------------------------------------------------------------------------------------------------------------------------------------------------------------------------------------------------------------------------------------------------------------------------------|-----------------------------------------------------------------------------------------------------------------------|
|                                  |                                                                                              | 10 Aug 2012                                                                                                                                                                                                                                                                                                                            | 13                                                                                                                    |
|                                  |                                                                                              | 11 Aug 2012                                                                                                                                                                                                                                                                                                                            | 14                                                                                                                    |
|                                  |                                                                                              | 12 Aug 2012                                                                                                                                                                                                                                                                                                                            | 15                                                                                                                    |
|                                  |                                                                                              | 13 Aug 2012                                                                                                                                                                                                                                                                                                                            | 16                                                                                                                    |
|                                  |                                                                                              | 15 Aug 2012                                                                                                                                                                                                                                                                                                                            | 18                                                                                                                    |
|                                  |                                                                                              | 16 Aug 2012                                                                                                                                                                                                                                                                                                                            | 19                                                                                                                    |
| Shu Qing<br>480<br>03 Aug 1999   | 26 Aug 2004, single<br><b>05 July 2007, twins</b><br>04/05 Aug 2008,<br>twins                | 08 July 2007<br>20 Aug 2007<br><br>10 Dec 2007                                                                                                                                                                                                                                                                                         | 3<br>46<br><br>158                                                                                                    |
| Qi Zhen<br>490<br>04 Sept 1999   | <b>07 Aug 2006, twins</b><br>10 Aug 2008, twins<br>06 Aug 2010, twins<br>04 Aug 2011, twins  | 12 Aug 2006<br>14 Aug 2006<br>13 Aug 2006<br>15 Aug 2006<br>10 Jan 2007<br>11 Jan 2007<br>14 Jan 2007<br>16 Jan 2007                                                                                                                                                                                                                   | 5<br>7<br>6<br>8<br>156<br>157<br>160<br>162                                                                          |
| Yuan Yuan<br>561<br>01 Aug 2003  | 06 Sept 2008, single<br>15 Aug 2010, twins<br><b>25 Aug 2012, twins, 1<br/>died same day</b> | 26 Aug 2012<br>27 Aug 2012<br>28 Aug 2012<br>29 Aug 2012<br>01 Sept 2012<br>04 Sept 2012<br>05 Sept 2012<br>08 Sept 2012<br>09 Sept 2012<br>10 Sept 2012<br>13 Sept 2012<br>16 Sept 2012<br>17 Sept 2012<br>19 Sept 2012<br>20 Sept 2012<br>21 Sept 2012<br>23 Sept 2012<br>24 Sept 2012<br>25 Sept 2012<br>01 Oct 2012<br>10 Oct 2012 | 1<br>2<br>3<br>4<br>7<br>10<br>11<br>14<br>15<br>16<br>19<br>22<br>23<br>25<br>26<br>27<br>29<br>30<br>31<br>37<br>46 |
| Xiao Yatou<br>635<br>13 Aug 2006 | <b>12 Aug 2012, single</b>                                                                   | 16 Aug 2012<br>24 Aug 2012<br>25 Aug 2012<br>26 Aug 2012                                                                                                                                                                                                                                                                               | 4<br>12<br>13<br>14                                                                                                   |

| Name, ISN & date of birth | Parturition history | Milk sample collection dates | Days post-partum |
|---------------------------|---------------------|------------------------------|------------------|
|                           |                     | 27 Aug 2012                  | 15               |
|                           |                     | 30 Aug 2012                  | 17               |
|                           |                     | 03 Sept 2012                 | 22               |
|                           |                     | 13 Sept 2012                 | 32               |
|                           |                     | 14 Sept 2012                 | 33               |
|                           |                     | 17 Sept 2012                 | 36               |
|                           |                     | 18 Sept 2012                 | 37               |
|                           |                     | 19 Sept 2012                 | 38               |
|                           |                     | 20 Sept 2012                 | 39               |
|                           |                     | 21 Sept 2012                 | 40               |
|                           |                     | 30 Sept 2012                 | 49               |
|                           |                     | 01 Oct 2012                  | 50               |
|                           |                     | 09 Oct 2012                  | 58               |

**Figure S2. Changes in protein profiles of giant panda milk with time after parturition – preparative two-dimensional gels.** Preparative two-dimensional gel electrophoresis of milk sampled on day1 (A; panda Li Li) and on day 152 (B; panda Ya Ya). The numbered protein spots were excised and subjected to tryptic digestion and mass spectrometry, after which peptide mass fingerprints were used to interrogate the giant panda genome with MASCOT software. Identifications of the numbered protein spots and comments are given in table S2. These identifications were combined with identifications from bands excised from 1-D gels to provide the protein identifications in Figure 3 of the main paper and the associated tables 1 and S3. First dimension (IEF) on IPG strips pH 3–10 and the second dimension on 4–12% gradient SDS-PAGE gels. The protein spots were visualized by Coomassie blue staining.

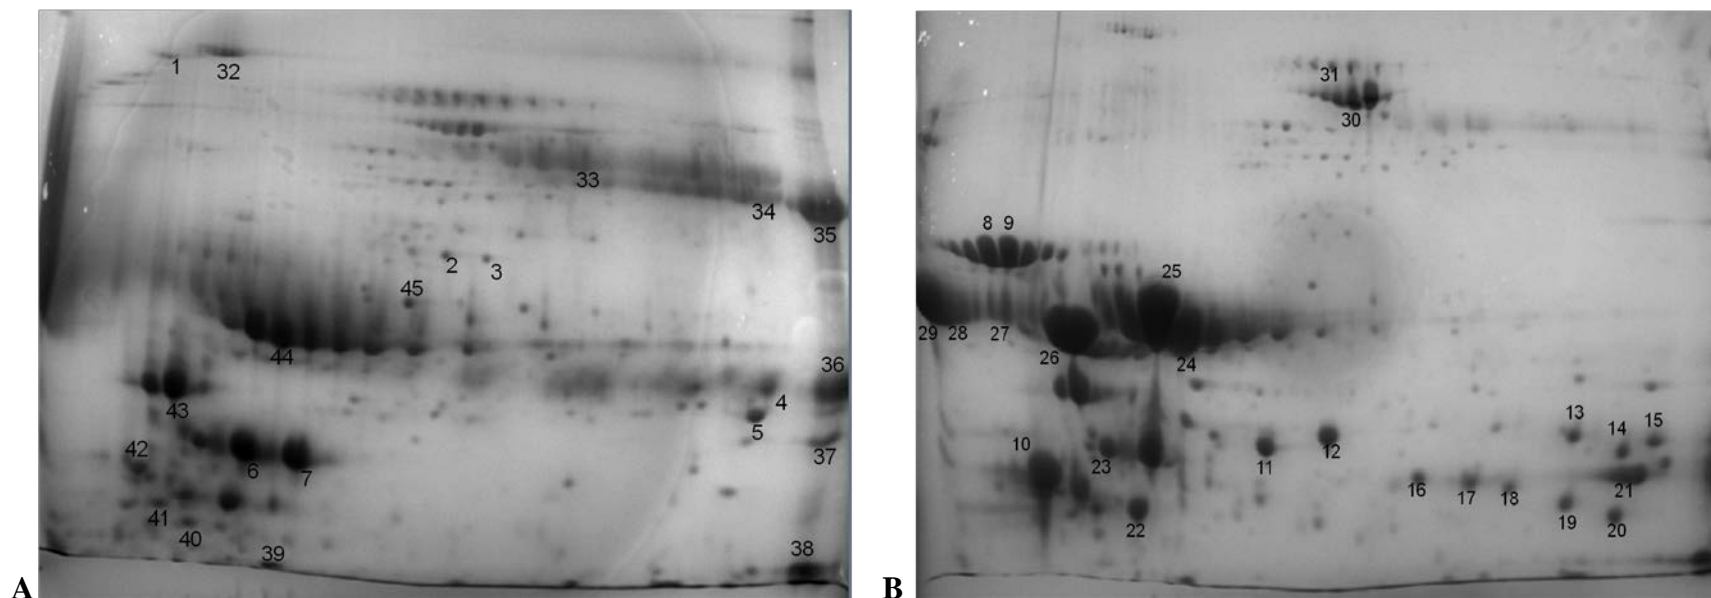

**Table S2. Identification of the proteins isolated from bands excised from the two-dimensional gels shown in Figure S2.** Milks sampled from panda Li Li 1 day and from Ya Ya 152 days after parturition. The putative functions and comments are drawn from a variety of sources including NCBI and UniProtKB/Swiss-Prot databases.

| Spot number (day of sample) <sup>a</sup> | Protein <sup>b</sup>              | Accession number <sup>c</sup> | Number of matches (unique peptides) <sup>d</sup> | Mascot score <sup>e</sup> | Putative function and comments <sup>f</sup>                                                                                                         |
|------------------------------------------|-----------------------------------|-------------------------------|--------------------------------------------------|---------------------------|-----------------------------------------------------------------------------------------------------------------------------------------------------|
| 1 (1)                                    | Bile salt-activated lipase        | gi 301777998                  | 67(36)                                           | 1286                      | Presumed to assist with digestion of lipids, triglycerides in particular.                                                                           |
| 2 (1)                                    | Polymeric immunoglobulin receptor | gi 301767800                  | 230(122)                                         | 4557                      | Receptor for IgA and IgM mediating secretion, part of which (secretory piece) binds to IgA to protect it against proteolytic cleavage in intestine. |
| 3 (1)                                    | Polymeric immunoglobulin receptor | gi 301767800                  | 230(122)                                         | 4160                      | Receptor for IgA and IgM mediating secretion, part of which (secretory piece) binds to IgA to protect it against proteolytic cleavage in intestine. |
| 4 (1)                                    | Immunoglobulin $\lambda^*$        | gi 281339129                  | 176(70)                                          | 3098                      | Light chain isoform associated with all immunoglobulin classes.                                                                                     |
| 5 (1)                                    | $\beta$ -casein                   | gi 301768260                  | 86(36)                                           | 905                       | Phosphoprotein. Source of amino acids, delivers calcium, phosphate, lipids. Determines the surface properties of the casein micelles.               |
| 6 (1)                                    | $\beta$ -lactoglobulin-1          | gi 301778529                  | 68(30)                                           | 584                       | Binds and probably transports retinol (vitamin A), vitamin D, fatty acids including PUFAs <sup>g</sup> .                                            |
| 7 (1)                                    | $\beta$ -lactoglobulin-1          | gi 301778533                  | 150(64)                                          | 2843                      | Binds and probably transports retinol (vitamin A), vitamin D, fatty acids including PUFAs <sup>g</sup> .                                            |
| 8 (152)                                  | $\beta$ -lactoglobulin-1          | gi 301778529                  | 71(24)                                           | 462                       | Binds and probably transports retinol (vitamin A), vitamin D, fatty acids including PUFAs <sup>g</sup> .                                            |
| 9 (152)                                  | Keratin                           | gi 301779149                  | 26(16)                                           | 639                       | Structural constituent of epidermis.                                                                                                                |
| 10 (152)                                 | Whey acidic protein               | gi 301777338                  | 93(41)                                           | 1247                      | Function unclear. Innate immunity? Regulates proliferation of mammary epithelial cells?                                                             |
| 11 (152)                                 | $\beta$ -lactoglobulin-2          | gi 301778531                  | 276(140)                                         | 4222                      | Binds and probably transports retinol (vitamin A), vitamin D, fatty acids including PUFAs <sup>g</sup> .                                            |

|          |                                                      |                              |                    |             |                                                                                                                                                                                                |
|----------|------------------------------------------------------|------------------------------|--------------------|-------------|------------------------------------------------------------------------------------------------------------------------------------------------------------------------------------------------|
| 12 (152) | $\beta$ -lactoglobulin-2<br>$\beta$ -lactoglobulin-1 | gi 301778531<br>gi 301778533 | 275(157)<br>71(32) | 4850<br>923 | Bind and probably transport retinol (vitamin A), vitamin D, fatty acids including PUFAs <sup>g</sup> .                                                                                         |
| 13 (152) | $\beta$ -lactoglobulin-2                             | gi 301778531                 | 125(2)             | 131         | Binds and probably transports retinol (vitamin A), vitamin D, fatty acids including PUFAs <sup>g</sup> .                                                                                       |
| 14 (152) | Keratin                                              | gi 301779149                 | 19(11)             | 414         | Structural constituent of epidermis.                                                                                                                                                           |
| 15 (152) | Keratin                                              | gi 301779149                 | 22(14)             | 467         |                                                                                                                                                                                                |
| 16 (152) | Anti-leukoproteinase                                 | gi 301764004                 | 83(27)             | 663         |                                                                                                                                                                                                |
| 17 (152) | Anti-leukoproteinase                                 | gi 301764004                 | 64(16)             | 320         | Acid-stable proteinase inhibitor with strong affinities for trypsin, chymotrypsin, elastase, and cathepsin G.                                                                                  |
| 18 (152) | Keratin                                              | gi 301779149                 | 19(10)             | 458         | Structural constituent of epidermis.                                                                                                                                                           |
| 19 (152) | Keratin                                              | gi 301779149                 | 12(8)              | 357         |                                                                                                                                                                                                |
| 20 (152) | Keratin                                              | gi 301779149                 | 11(7)              | 173         |                                                                                                                                                                                                |
| 21 (152) | Anti-leukoproteinase                                 | gi 301764004                 | 31(11)             | 289         | Acid-stable proteinase inhibitor with strong affinities for trypsin, chymotrypsin, elastase, and cathepsin G.                                                                                  |
| 22 (152) | $\alpha$ -lactalbumin- 2                             | gi 301783681                 | 87(40)             | 1037        | Regulatory subunit of lactose synthase. Changes the substrate specificity of galactosyltransferase making glucose a good acceptor substrate for this enzyme enabling LS to synthesize lactose. |
| 23 (152) | $\beta$ -lactoglobulin-1,                            | gi 301778533                 | 60(23)             | 575         | Binds and probably transports retinol (vitamin A), vitamin D, fatty acids including PUFAs <sup>g</sup> .                                                                                       |
|          | $\alpha$ -lactalbumin-2                              | gi 301783681                 | 15(6)              | 137         | Regulatory subunit of lactose synthase. Changes the substrate specificity of galactosyltransferase making glucose a good acceptor substrate for this enzyme enabling LS to synthesize lactose. |
| 24 (152) | $\beta$ -casein                                      | gi 301768260                 | 73(18)             | 516         | Phosphoprotein. Source of amino acids, delivers calcium, phosphate, lipids. Determines the surface properties of the casein micelles.                                                          |
| 25 (152) | $\beta$ -casein                                      | gi 301768260                 | 67(19)             | 508         |                                                                                                                                                                                                |
| 26 (152) | $\beta$ -casein                                      | gi 301768260                 | 23(7)              | 230         |                                                                                                                                                                                                |
| 27 (152) | $\beta$ -casein                                      | gi 301768260                 | 4(2)               | 92          |                                                                                                                                                                                                |
| 28 (152) | Keratin                                              | gi 301775745                 | 2(2)               | 108         | Structural constituent of epidermis.                                                                                                                                                           |



|          |                                     |              |          |      |                                                                                                                                                                                                     |
|----------|-------------------------------------|--------------|----------|------|-----------------------------------------------------------------------------------------------------------------------------------------------------------------------------------------------------|
| 29 (152) | $\kappa$ -casein                    | gi 281347661 | 3(2)     | 79   | Stabilizes micelle formation, preventing casein precipitation in milk.                                                                                                                              |
| 30 (152) | Serum albumin                       | gi 301786252 | 243(127) | 3508 | Main protein of plasma. Binds $\text{Ca}^{2+}$ , $\text{Na}^+$ , $\text{K}^+$ , fatty acids, hormones, bilirubin and drugs. Major zinc transporter of plasma.                                       |
| 31 (152) | Polymeric immunoglobulin receptor   | gi 301767800 | 59(25)   | 876  | Receptor for IgA and IgM mediating secretion, part of which (secretory piece) binds to IgA to protect it against proteolytic cleavage in intestine.                                                 |
| 32 (1)   | Bile salt-activated lipase          | gi 301777998 | 66(34)   | 1033 | Also termed stimulated- or dependent-lipase. Presumed to assist with digestion of lipids, triglycerides in particular.                                                                              |
| 33 (1)   | Immunoglobulin $\alpha$             | gi 62183972  | 33(15)   | 346  | Heavy chain of IgA. Secretory antibody. Abundant in secretions (e.g. tears, saliva, bile, milks).                                                                                                   |
| 34 (1)   | Immunoglobulin $\gamma$             | gi 62183980  | 33(16)   | 520  | Heavy chain of immunoglobulin G (IgG). Antibody. Abundant in serum, less so in secretions.                                                                                                          |
|          | Lactadherin                         | gi 301768371 | 34(11)   | 445  | Maintains intestinal epithelial homeostasis and the promotion of mucosal healing.                                                                                                                   |
| 35 (1)   | Immunoglobulin $\gamma$ heavy chain | gi 62183978  | 74(38)   | 1038 | Immunoglobulin G (IgG). Antibody. Abundant in serum, less so in secretions.                                                                                                                         |
|          | Lactadherin                         | gi 301768371 | 20(13)   | 413  | Maintains intestinal epithelial homeostasis and the promotion of mucosal healing.                                                                                                                   |
| 36 (1)   | Immunoglobulin $\lambda^*$          | gi 281339129 | 37(18)   | 676  | Light chain isoform associated with all immunoglobulin subclasses.                                                                                                                                  |
| 37 (1)   | No confident prediction             |              |          |      |                                                                                                                                                                                                     |
| 38 (1)   | Lysozyme C                          | gi 301783675 | 34(15)   | 527  | Milk isoform of lysozyme. Anti-bacterial.                                                                                                                                                           |
| 39 (1)   | $\alpha$ -lactalbumin-2             | gi 301783681 | 43(23)   | 662  | Regulatory subunit of lactose synthase. Changes the substrate specificity of galactosyltransferase, making glucose a good acceptor substrate for this enzyme and enabling LS to synthesize lactose. |

|        |                          |              |         |     |                                                                                                                                                                                                                |
|--------|--------------------------|--------------|---------|-----|----------------------------------------------------------------------------------------------------------------------------------------------------------------------------------------------------------------|
| 40 (1) | $\alpha$ -lactalbumin-1, | gi 301783679 | 14(11)  | 286 | Regulatory subunit of lactose synthase. Changes the substrate specificity of galactosyltransferase making glucose a good acceptor substrate for this enzyme enabling LS to synthesize lactose.                 |
|        | $\beta$ -casein,         | gi 301768260 | 35(7)   | 165 | Phosphoprotein. Source of amino acids, delivers calcium, phosphate, lipids. Determines the surface properties of the casein micelles.                                                                          |
|        | $\beta$ -lactoglobulin-1 | gi 301778529 | 7(4)    | 116 | Binds and probably transports retinol (vitamin A), vitamin D, fatty acids including PUFAs <sup>g</sup> .                                                                                                       |
| 41 (1) | $\alpha$ -lactalbumin-1  | gi 301783679 | 8(4)    | 115 | Regulatory subunit of lactose synthase. Changes the substrate specificity of galactosyltransferase making glucose a good acceptor substrate for this enzyme, and enabling LS to synthesize lactose.            |
| 42 (1) | Whey acidic protein      | gi 301777338 | 23(14)  | 422 | Function unclear. Possibly associated with innate immunity; possible role in regulation of mammary epithelial cell proliferation.                                                                              |
| 43 (1) | $\beta$ -lactoglobulin-1 | gi 301778533 | 110(33) | 858 | Binds and probably transports retinol (vitamin A), vitamin D, fatty acids including PUFAs <sup>g</sup> .                                                                                                       |
| 44 (1) | $\beta$ -casein          | gi 301768260 | 85(32)  | 815 | Phosphoprotein. Source of amino acids, delivers calcium, phosphate, lipids. Determines the surface properties of the casein micelles.                                                                          |
| 45 (1) | Haptoglobin              | gi 301776456 | 105(43) | 926 | Indicator of infection or inflammation. Acute phase protein. Captures free haemoglobin. Anti-microbial. Also found to high confidence by 2-D gel analysis in 12 hours post-partum sample from the same animal. |

<sup>a</sup> Gel bands as indicated in Figure S1.

<sup>b</sup> identification

<sup>c</sup> NCBI Genbank GenInfo accession codes.

<sup>d</sup> Number of peptides found to match with number of peptides unique to this identification in parentheses.

<sup>e</sup> MASCOT (MOWSE) search score where scores greater than 38 are taken to be significant.

<sup>f</sup> Putative functions as listed in NCBI GenBank and UniProtKB databases.

<sup>g</sup> Highly abundant in many mammalian milks. Some species produce only one isoform, and others, such as humans, produce none. PUFAs, polyunsaturated fatty acids.

These identifications were confirmed from 2-D gels carried out on Li Li's milk sampled 12 hours after birth and on day 22.

gi|xxx Accession number from NCBI Genbank database for *Canis lupus familiaris genome* database.

\*This identification from BLAST searching of GenBank with nearest similarity in *Canis lupus familiaris* database, but also *Ursus maritimus*; the *A. melanoleuca* NCBI GenBank GeneInfo accession code given here.

**Table S3. Proteins in giant panda milk.** Identification of the proteins isolated from bands excised from the 1-D SDS-PAGE gels shown in Figure 3 of the main paper, and as an expansion of table 1 of the main paper. The putative functions and comments are drawn from a variety of sources including NCBI and UniProtKB/Swiss-Prot databases.

| Band label <sup>a</sup> | Protein identification <sup>b</sup>  | Accession number <sup>c</sup> | Number of matches (unique peptides) <sup>d</sup> | Mascot score <sup>e</sup> | Putative function and comments <sup>f</sup>                                                                                                         |
|-------------------------|--------------------------------------|-------------------------------|--------------------------------------------------|---------------------------|-----------------------------------------------------------------------------------------------------------------------------------------------------|
| A                       | Immunoglobulin $\lambda$ light chain | gi 281339129*                 | 1(1)                                             | 78                        | Light chain isoform associated with all immunoglobulin subclasses.                                                                                  |
|                         | Immunoglobulin $\mu$ heavy chain     | gi 62183982                   | 2(0)                                             | 63                        | Heavy chain of immunoglobulin M (IgM). Antibody. Abundant in serum, less so in secretions. Abundant in colostrum.**                                 |
| B                       | Immunoglobulin $\alpha$              | gi 62183972                   | 20(5)                                            | 167                       | Heavy chain of immunoglobulin A (IgA). Antibody. Abundant in secretions (e.g. tears, saliva, bile, milks).                                          |
| C                       | Immunoglobulin $\alpha$              | gi 62183972                   | 45(14)                                           | 379                       | Heavy chain constant region of immunoglobulin A (IgA). Antibody. Abundant in secretions (e.g. tears, saliva, bile, milks).                          |
|                         | Polymeric immunoglobulin receptor    | gi 301767800                  | 23(9)                                            | 290                       | Receptor for IgA and IgM mediating secretion, part of which (secretory piece) binds to IgA to protect it against proteolytic cleavage in intestine. |
| D                       | Immunoglobulin $\gamma$ heavy chain  | gi 62183980                   | 39(12)                                           | 430                       | Heavy chain of immunoglobulin G (IgG). Antibody. Abundant in serum, less so in secretions.                                                          |
| E                       | Immunoglobulin $\gamma$ heavy chain  | gi 62183980                   | 15(6)                                            | 201                       | Heavy chain of immunoglobulin G (IgG). Antibody. Abundant in serum, less so in secretions.                                                          |
| F                       | Bile salt-activated lipase ***       | gi 301777998                  | 22(11)                                           | 238                       | Presumed to assist with digestion of lipids, triglycerides in particular. Also termed bile salt stimulated- or dependent-lipase.                    |
| G                       | $\beta$ -lactoglobulin-2             | gi 301778529                  | 2(1)                                             | 70                        | Bind and probably transport retinol (vitamin A), vitamin D, fatty acids including PUFAs <sup>g</sup> .                                              |
|                         | $\beta$ -lactoglobulin-1             | gi 281347108                  | 7(2)                                             | 69                        |                                                                                                                                                     |
|                         | $\kappa$ -casein                     | gi 281347661                  | 3(1)                                             | 46                        | Stabilizes micelle formation, preventing casein precipitation in milk.                                                                              |
| H                       | $\beta$ -casein                      | gi 301768260                  | 39(13)                                           | 362                       | Source of amino acids, delivers calcium, phosphate, lipids.                                                                                         |

| Band label <sup>a</sup> | Protein identification <sup>b</sup> | Accession number <sup>c</sup> | Number of matches (unique peptides) <sup>d</sup> | Mascot score <sup>e</sup> | Putative function and comments <sup>f</sup>                                                                                                         |
|-------------------------|-------------------------------------|-------------------------------|--------------------------------------------------|---------------------------|-----------------------------------------------------------------------------------------------------------------------------------------------------|
| I                       | Lactotransferrin                    | gi 301754041                  | 1(1)                                             | 48                        | Iron binding transport proteins with anti-bacterial properties. Low quality identification.                                                         |
| J                       | $\beta$ -lactoglobulin-1            | gi 301778533                  | 9(2)                                             | 81                        | Binds and probably transports retinol (vitamin A), vitamin D, fatty acids including PUFAs <sup>g</sup> .                                            |
| K                       | $\beta$ -lactoglobulin isoform 1    | gi 301778529                  | 9(3)                                             | 75                        | Binds and probably transports retinol (vitamin A), vitamin D, fatty acids including PUFAs <sup>g</sup> .                                            |
|                         | Anti-leukoproteinase                | gi 301778531                  | 6(3)                                             | 74                        | Acid-stable proteinase inhibitor with strong affinities for trypsin, chymotrypsin, elastase, and cathepsin G.                                       |
| L                       | Lysozyme C                          | gi 301783675                  | 14(6)                                            | 265                       | Milk isoform of lysozyme. Anti-bacterial.                                                                                                           |
| M                       | Whey acidic protein                 | gi 301777338                  | 4(2)                                             | 81                        | Function unclear. Possibly associated with innate immunity. Possibly plays role in regulation of the proliferation of mammary epithelial cells.     |
|                         | Lysozyme C                          | gi 301783675                  | 1(1)                                             | 55                        | Milk isoform of lysozyme. Anti-bacterial.                                                                                                           |
| N                       | Xanthine dehydrogenase              | gi 301783299                  | 42(19)                                           | 528                       | Milk fat globule secretion. Innate immunity.                                                                                                        |
| O                       | Bile salt-activated lipase ***      | gi 301777998                  | 22(4)                                            | 158                       | Presumed to assist with digestion of lipids, triglycerides in particular. Also termed bile salt stimulated- or dependent-lipase.                    |
| P                       | Polymeric immunoglobulin receptor   | gi 301767800                  | 16(7)                                            | 217                       | Receptor for IgA and IgM mediating secretion, part of which (secretory piece) binds to IgA to protect it against proteolytic cleavage in intestine. |
| Q                       | Immunoglobulin $\gamma$ heavy chain | gi 62183980                   | 20(7)                                            | 222                       | Immunoglobulin G (IgG). Antibody. Abundant in serum, less so in secretions.                                                                         |
| R                       | $\beta$ -casein                     | gi 301768260                  | 5(0)                                             | 53                        | Phosphoprotein. Source of amino acids, delivers calcium, phosphate, lipids. Determines the surface properties of the casein micelles.               |

| <b>Band label<sup>a</sup></b> | <b>Protein identification<sup>b</sup></b> | <b>Accession number<sup>c</sup></b> | <b>Number of matches (unique peptides)<sup>d</sup></b> | <b>Mascot score<sup>e</sup></b> | <b>Putative function and comments<sup>f</sup></b>                                                                                                          |
|-------------------------------|-------------------------------------------|-------------------------------------|--------------------------------------------------------|---------------------------------|------------------------------------------------------------------------------------------------------------------------------------------------------------|
| S                             | Apolipoprotein D isoform 2                | gi 301772170                        | 14(6)                                                  | 163                             | Lipid transporter.                                                                                                                                         |
|                               | $\beta$ -casein                           | gi 301768260                        | 8(2)                                                   | 62                              | Source of amino acids, delivers calcium, phosphate, lipids.                                                                                                |
|                               | Immunoglobulin $\lambda$ light chain      | gi 73995681*                        | 5(1)                                                   | 60                              | Light chain isoform associated with all immunoglobulin subclasses.                                                                                         |
| T                             | Immunoglobulin $\lambda$ light chain      | gi 281339129*                       | 41(14)                                                 | 467                             | Immunoglobulin G (IgG). Antibody. Abundant in serum, less so in secretions. One of two light-chain isoforms associated with all immunoglobulin subclasses. |
| U                             | $\beta$ -lactoglobulin-1                  | gi 301778533                        | 7(3)                                                   | 64                              | Binds and probably transports retinol (vitamin A), vitamin D, fatty acids including PUFAs <sup>g</sup> .                                                   |

<sup>a</sup> Gel bands as indicated in Figure 3.

<sup>b</sup> Protein identification

<sup>c</sup> NCBI Genbank accession codes and MASCOT data (number of unique peptides, sequence coverage, MASCOT score).

<sup>d</sup> Number of peptides found to match with number of peptides unique to this identification in parenthesis.

<sup>e</sup> MASCOT (MOWSE) search score where scores greater than 38 are taken to be significant.

<sup>f</sup> Putative functions as listed in NCBI GenBank and UniProtKB databases.

<sup>g</sup> PUFAs, polyunsaturated fatty acids. Highly abundant in many mammalian milks. Some species produce only one isoform, and others, such as humans, produce none.

\*This identification from BLAST searching of GenBank with nearest similarity in *Canis lupus familiaris* database, but also *Ursus maritimus*; the *A. melanoleuca* NCBI GenBank GeneInfo accession code given here.

\*\*Good identification as an immunoglobulin. Low level but positive identification as containing immunoglobulin  $\mu$  chain, but migration rate in protein electrophoresis consistent with IgM.

\*\*\* One of the pandas (Xiao Yatou) produced a higher molecular sized isoform of this enzyme, possibly reflecting a polymorphism in glycosylation of this enzyme within the species (not shown). Such glycosylation could be relevant to protection against pathogens (ref. (1) and see also below).

For this table, all known identifications of trypsin (autoproteolysis during trypsin digestion stage) and keratin peaks (from panda or human skin and hair) were excluded.

**Table S4. Relative abundance of the 10 most common small molecules in giant panda milks in colostrum and mature milk, compared with mature phase human and cow milks.** Relative abundance is ranked according to peak heights and areas under the mass spectrometry data peaks. The giant panda samples were collected on the indicated days postpartum and the human and bovine samples were collected during mid lactation. Compounds listed in bold are discussed in the text. Time-dependent trends of fucosyllactose and lactose are presented in Figures 4 and S3, respectively. PC, phosphatidylcholine. PE, phosphatidylethanolamine.

| <b>Giant panda day 3</b>   | <b>Giant panda day 46</b> | <b>Giant panda day 158</b> | <b>Human</b>        | <b>Cow</b>             |
|----------------------------|---------------------------|----------------------------|---------------------|------------------------|
|                            |                           |                            |                     |                        |
| Glycerophosphocholine      | Glycerophosphocholine     | Glycerophosphocholine      | <b>Lactose</b>      | Valine                 |
| <b>Sialyl lactose</b>      | <b>Sialyl lactose</b>     | <b>Fucosyllactose</b>      | Choline             | Creatine               |
| <b>Lactose</b>             | <b>Lactose</b>            | Creatinine                 | Glutamine           | acetylcarnitine        |
| Creatine                   | Lyso PC 16:0              | Carnitine                  | Alanine             | <b>Lactose</b>         |
| Lyso PC 16:0               | Carnitine                 | Lyso PC 16:0               | Acetylcarnitine     | Creatinine             |
| Creatinine                 | <b>Taurine</b>            | Glycerophosphoethanolamine | Leucine             | N-acetylglucosamine    |
| Lyso PE 18:1               | Lyso PE 18:1              | Lyso PE 18:1               | Glutamate           | Carnitine              |
| <b>Taurine</b>             | Acetyl carnitine          | <b>Taurine</b>             | Glucose             | riboflavin             |
| Glycerophosphoethanolamine | Pentanoylcarnitine        | Lyso PE 18:1               | N-acetylglucosamine | N-acetylanthranilate   |
| Lyso PC 18:0               | Choline                   | Formiminotetrahydrofolate  | Stachyose           | Propionyl choline      |
| N-acetylgalactosamine      | Formiminotetrahydrofolate | Choline                    | Threonine           | Octadecadienylglycerol |



**Table S5. Milk oligosaccharides reported in this and previous studies on giant pandas and other species of bear, and their post-partum trends in giant panda milk.** This list is confined to those oligosaccharides definitively identified in this study – others were found but not fully identified. Their details are available on request. See also Figure S3 for graphical presentations of trends in concentrations with time after birth.

| <b>Chemical formula</b>          | <b>Subunit formula and name of compound</b>                                       | <b>Reference</b> | <b>Observed post-partum trend in giant panda milk (this study)</b>               |
|----------------------------------|-----------------------------------------------------------------------------------|------------------|----------------------------------------------------------------------------------|
| <b>Found in giant panda milk</b> |                                                                                   |                  |                                                                                  |
| C12H22O11                        | Lactose *                                                                         | (2, 3)           | Initially high, gradually decreases.                                             |
| C23H39NO19                       | Neu5Ac( $\alpha$ 2-3)Gal( $\beta$ 1-4)Glc (3'-N-acetylneuraminylactose)           | (2, 3)           | Initially high, gradually decreases.                                             |
| C23H39NO19                       | Neu5Ac( $\alpha$ 2-3)Gal( $\beta$ 1-4)Glc (6'-N-acetylneuraminylactose)           | (2)              | Initially low, gradual increase to plateau after 20 days.                        |
| C29H49NO23                       | Neu5Ac( $\alpha$ 2-3)Gal( $\beta$ 1-4)Fuc( $\alpha$ 1-3)Glc                       | (2)              | Zero or low, rapid increase after 7 days to plateau after 20 days.               |
| C18H32O16                        | Gal( $\alpha$ 1-3)Gal( $\beta$ 1-4)Glc (isoglobotriose)                           | (2, 3)           | Gradual increase to plateau after 20 days.                                       |
| C24H42O20                        | Gal( $\alpha$ 1-3)Gal( $\beta$ 1-4)Fuc( $\alpha$ 1-3)Glc (fucosyl isoglobotriose) | (2, 3)           | Initially zero or low then rapid increase after 7 days to plateau after 20 days. |

\* Lactose is the dominant sugar in cow and human milks, but is low or absent in the milks of many Carnivora.

**Table S5 continued.**

| <b>Chemical formula</b>                                                         | <b>Subunit formula and name of compound</b>                 | <b>Reference</b> | <b>Observed post-partum trend in giant panda milk (this study)</b> |
|---------------------------------------------------------------------------------|-------------------------------------------------------------|------------------|--------------------------------------------------------------------|
| <b>Found in both giant panda milk and in the milks of other species of bear</b> |                                                             |                  |                                                                    |
| C18H32O15                                                                       | Fuc( $\alpha$ 1-2)Gal( $\beta$ 1-4)Glc (2'-fucosyl lactose) | (3-6)            | Initially low then dramatic increase after 20 days.                |

|              |                                                                                                                                                                                                        |        |                                                   |
|--------------|--------------------------------------------------------------------------------------------------------------------------------------------------------------------------------------------------------|--------|---------------------------------------------------|
| C26H45NO20   | GalNAc( $\alpha$ 1-3)[Fuc( $\alpha$ 1-2)]Gal( $\beta$ 1-4)Glc (tetrasaccharide) (human blood group A determinant)                                                                                      | (3, 6) | Zero or low until 20 days then dramatic increase. |
| C62H102N4O47 | Neu5Ac( $\alpha$ 2-6)Gal( $\beta$ 1-4)GlcNAc( $\beta$ 1-3)[Neu5Ac( $\alpha$ 2-6)Gal( $\beta$ 1-4)GlcNAc( $\beta$ 1-6)]Gal( $\beta$ 1-4)Glc                                                             | (7)    | Initially low then increase after 20 days.        |
| C38H65NO30   | Gal( $\alpha$ 1-3)Gal( $\beta$ 1-4)[Fuc( $\alpha$ 1-3)]GlcNAc( $\beta$ 1-3)Gal( $\beta$ 1-4)Glc                                                                                                        | (4, 6) | Low until 20 days then rapid increase.            |
| C44H75NO34   | Gal( $\alpha$ 1-3)[Fuc( $\alpha$ 1-2)]Gal( $\beta$ 1-4)[Fuc( $\alpha$ 1-3)]GlcNAc( $\beta$ 1-3)Gal( $\beta$ 1-4)Glc (difucosylheptasaccharide)                                                         | (5)    | Low until 20 days then rapid increase.            |
| C63H105N3O48 | Neu5Ac( $\alpha$ 2-6)Gal( $\beta$ 1-4)GlcNAc( $\beta$ 1-3){Gal( $\alpha$ 1-3)Gal( $\beta$ 1-4)[Fuc( $\alpha$ 1-3)]GlcNAc( $\beta$ 1-6)}Gal( $\beta$ 1-4)Glc                                            | (7)    | Initially low then increases after 20 days.       |
| C64H108N2O49 | Gal( $\alpha$ 1-3)Gal( $\beta$ 1-4)[Fuc( $\alpha$ 1-3)]GlcNAc( $\beta$ 1-3)[Gal( $\alpha$ 1-3)Gal( $\beta$ 1-4)[Fuc( $\alpha$ 1-3)]GlcNAc( $\beta$ 1-6)]Gal( $\beta$ 1-4)Glc (difucosyldecasaccharide) | (5, 6) | Initially low then increases after 20 days.       |

**Figure S3. Diversity in the concentration time courses of selected giant panda milk oligosaccharides with time after birth.**

Time course plots of seven of the oligosaccharides listed in table S4 to illustrate the diversity in the timings of their appearances or reductions with time after birth. Particularly notable are those that are undetectable at first then rise in relative concentrations abruptly but at different times.

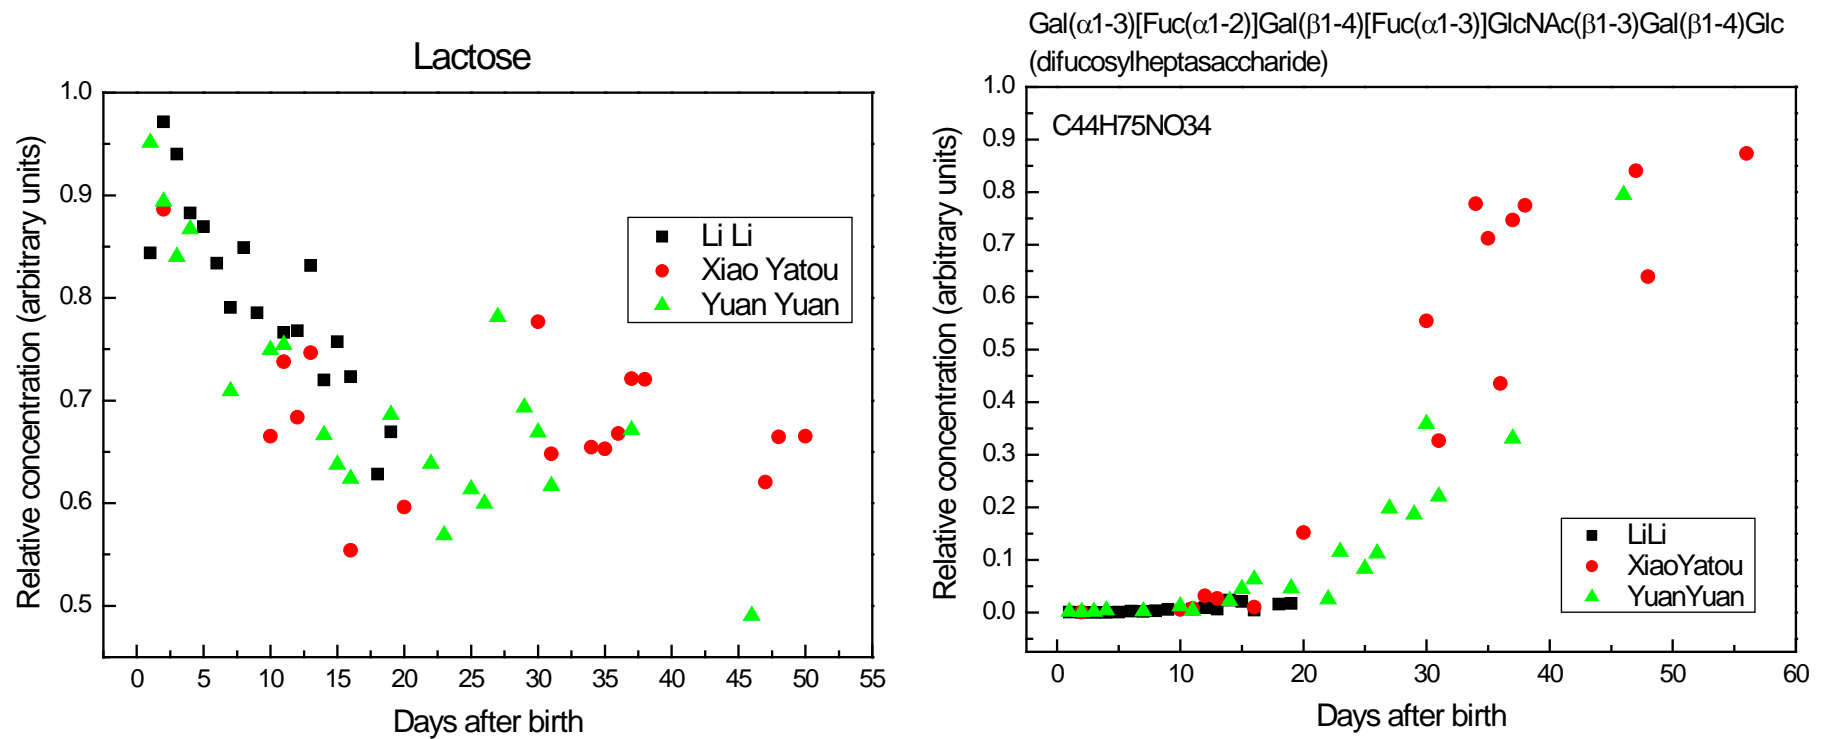

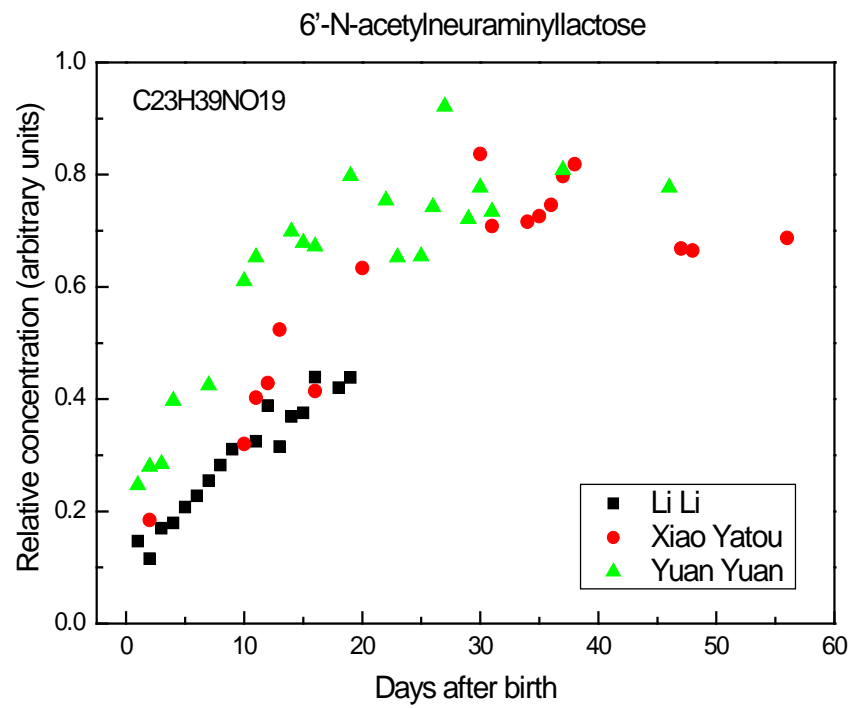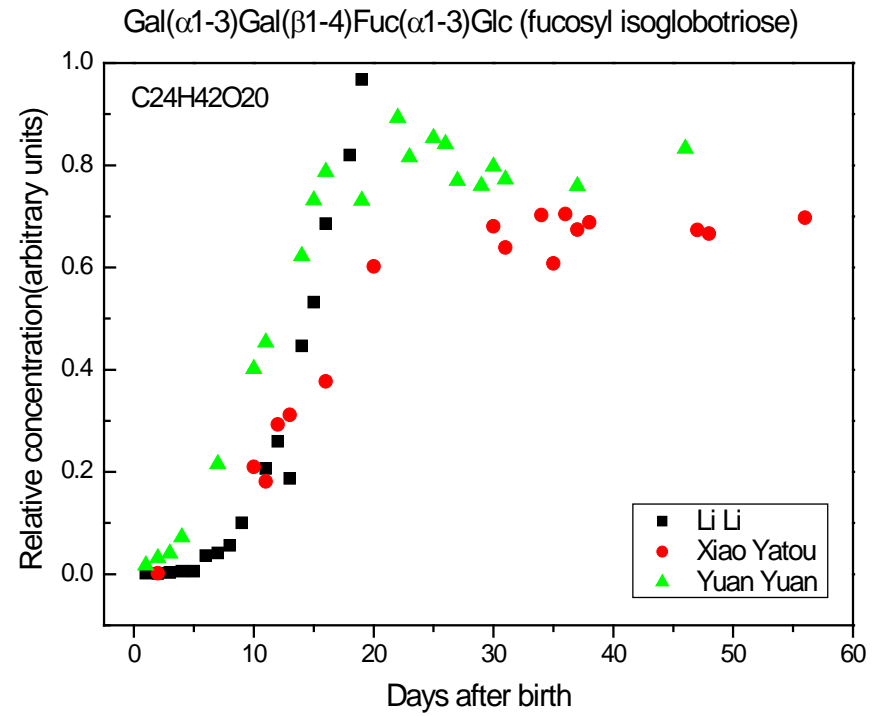

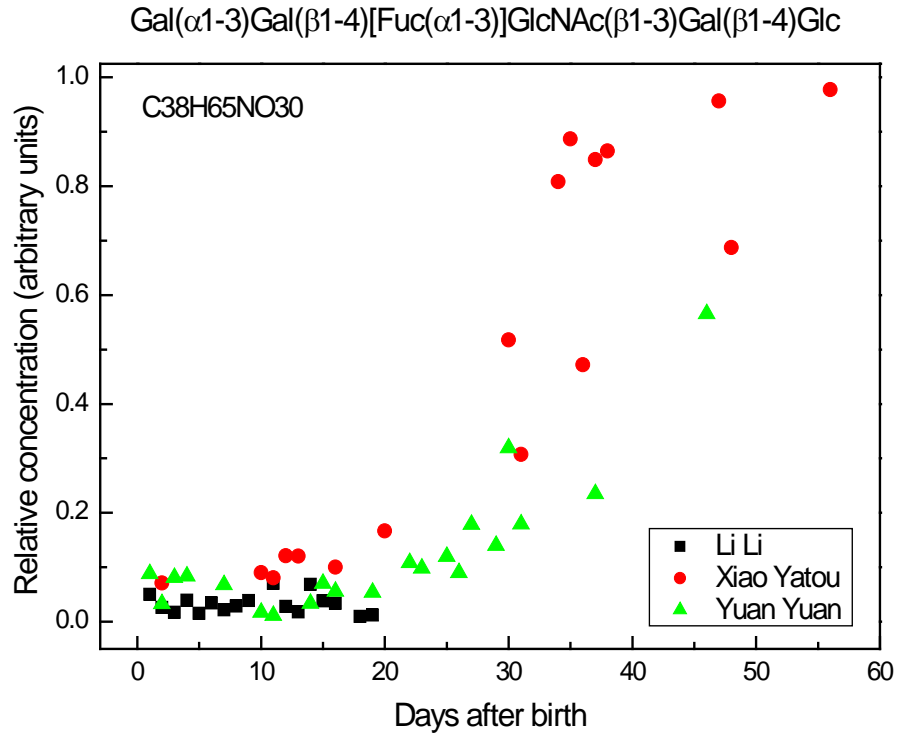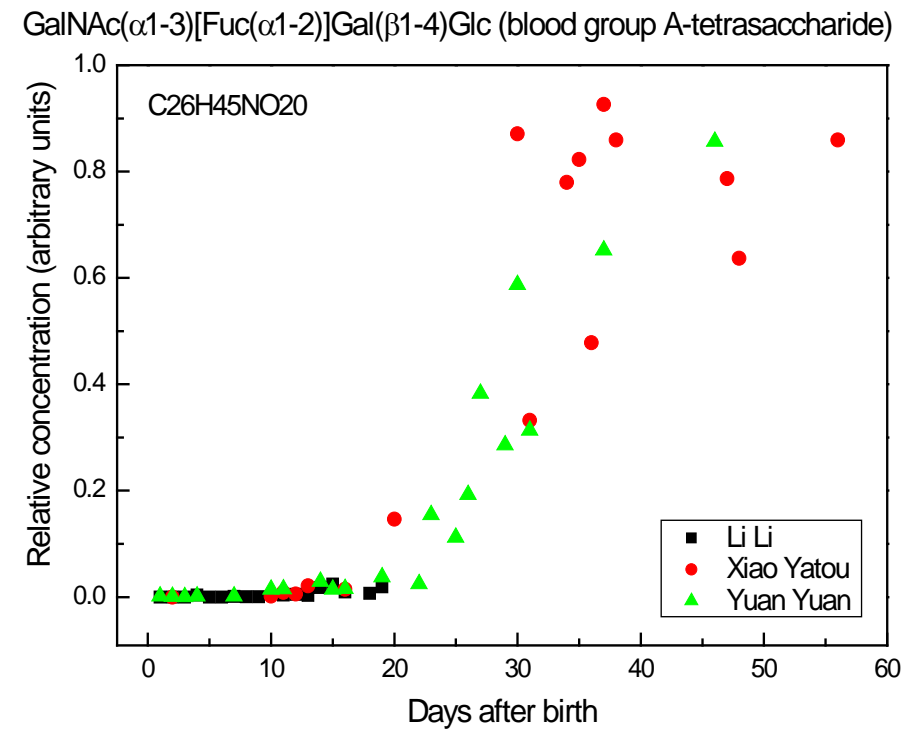

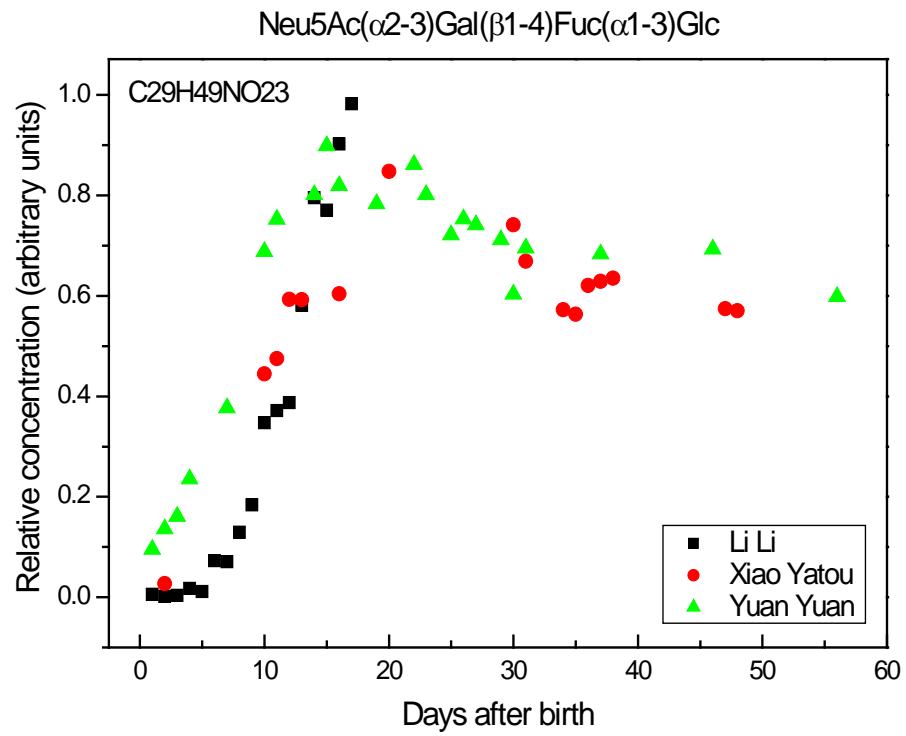

## References for electronic supplementary material

1. Ruvoen-Clouet N, Mas E, Marionneau S, Guillon P, Lombardo D, Pendu JL. 2006 Bile-salt-stimulated lipase and mucins from milk of 'secretor' mothers inhibit the binding of Norwalk virus capsids to their carbohydrate ligands. *Biochemical Journal* **393**, 627-634. (doi: 10.1042/bj20050898)
2. Nakamura T, Urashima T, Mizukami T, Fukushima M, Arai I, Senshu T, Imazu K, Nakao T, Saito T, Ye ZY, Zuo H, Wu KJ. 2003 Composition and oligosaccharides of a milk sample of the giant panda, *Ailuropoda melanoleuca*. *Comparative Biochemistry and Physiology B-Biochemistry & Molecular Biology* **135**, 439-448. (doi: 10.1016/s1096-4959(03)00093-9)
3. Urashima T, Nagata H, Nakamura T, Arai I, Saito T, Imazu K, Hayashi T, Derocher AE, Wiig O. 2003 Differences in oligosaccharide pattern of a sample of polar bear colostrum and mid-lactation milk. *Comparative biochemistry and physiology Part B, Biochemistry & molecular biology* **136**, 887-896.
4. Urashima T, Kusaka Y, Nakamura T, Saito T, Maeda N, Messer M. 1997 Chemical characterization of milk oligosaccharides of the brown bear, *Ursus arctos yesoensis*. *Biochimica et biophysica acta* **1334**, 247-255.
5. Urashima T, Sumiyoshi W, Nakamura T, Arai I, Saito T, Komatsu T, Tsubota T. 1999 Chemical characterization of milk oligosaccharides of the Japanese black bear, *Ursus thibetanus japonicus*. *Biochimica et biophysica acta* **1472**, 290-306.
6. Urashima T, Yamashita T, Nakamura T, Arai I, Saito T, Derocher AE, Wiig O. 2000 Chemical characterization of milk oligosaccharides of the polar bear, *Ursus maritimus*. *Biochimica et biophysica acta* **1475**, 395-408.
7. Urashima T, Nakamura T, Teramoto K, Arai I, Saito T, Komatsu T, Tsubota T. 2004 Chemical characterization of sialyl oligosaccharides in milk of the Japanese black bear, *Ursus thibetanus japonicus*. *Comparative biochemistry and physiology Part B, Biochemistry & molecular biology* **139**, 587-595. (doi: 10.1016/j.cbpc.2004.07.012)
